# Supplementary material
Source: Springer Nature journal article supplement (http://www.springermedizin.de/resource/supplementary/13023_2008_144_MOESM1_ESM.pdf/9641728)

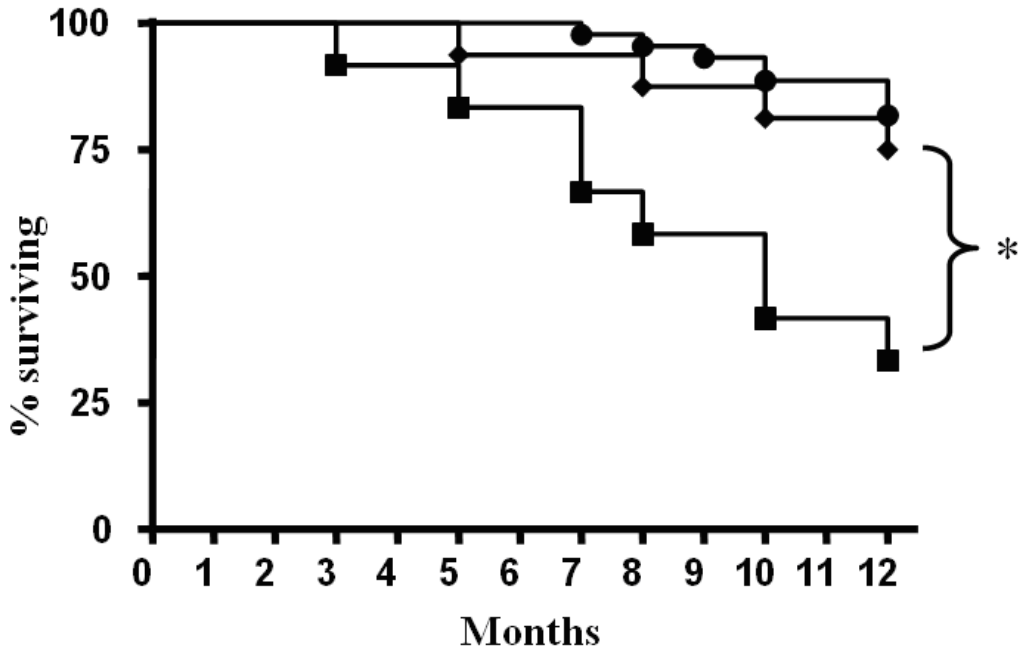

Supplement: MOESM1 [file 9641728]
